# Supplementary material for: Plant Feed Additives as Natural Alternatives to the Use of Synthetic Antioxidant Vitamins in Livestock Animal Products Yield, Quality, and Oxidative Status: A Review
Source: MDPI journal article supplement (doi:10.3390/antiox10050780), 2021-05-14
Supplement: s1 [file s1]

Table S1. Effects of plant feed additives on monogastrics meat quality traits

| PFA                              | Dose extract<br>(% of the diet)              | Species | Vitamin<br>confronted                                                    | Type of parameter                | Trait evaluated                                                       | Comparison to negative<br>control: effect (plant<br>product dose) | Comparison to positive<br>control: effect (dose) | Period of<br>study | Reference                 |
|----------------------------------|----------------------------------------------|---------|--------------------------------------------------------------------------|----------------------------------|-----------------------------------------------------------------------|-------------------------------------------------------------------|--------------------------------------------------|--------------------|---------------------------|
| Oregano essential oil            | 0.025                                        | Swine   | E                                                                        | Meat traits                      | pH 45 min post-mortem                                                 | NTS: ↓3.17%; TS: ↑4.04%                                           | NS                                               | 28 days            | Zou et al., 2017          |
|                                  |                                              |         | Transport<br>stressed<br>(TS)<br>Not<br>transported<br>stressed<br>(NTS) |                                  | pHu (24 h), MC (45 min),<br>MC (24 h), EC (45 min), EC<br>(24 h), IMF | NS                                                                | NS                                               |                    |                           |
|                                  |                                              |         |                                                                          |                                  | Drip loss                                                             | TS: ↓49.43%                                                       | ↓46.04%                                          |                    |                           |
| Oregano and Rosemary<br>extracts | 0.2 (OP), 0.2<br>(RP), 0.1OP+<br>0.1RP(OPRP) | Rabbits | E                                                                        | Slaughter traits                 | CW                                                                    | ↑6.5% (OE) ↑5.98%<br>(OPRP)                                       | ↑6.26% (OE) ↑5.74% (OPRP)                        | 50 days            | Cardinali et al.,<br>2015 |
|                                  |                                              |         |                                                                          |                                  | CY                                                                    | ↑3.4% (O) ↑3.91% (R)<br>↑1.87% (OR)                               | ↑4.11% (O) ↑4.62% (R)<br>↑2.57% (OR)             |                    |                           |
|                                  |                                              |         |                                                                          | Meat composition in LD<br>muscle | Moisture                                                              | NS                                                                | ↑2.19% (O) ↑2.05% (ORRP)                         |                    |                           |
|                                  |                                              |         |                                                                          |                                  | Protein                                                               | NS                                                                | ↓6% (O) ↓5.6% (ORRP)                             |                    |                           |
|                                  |                                              |         |                                                                          |                                  | Ash                                                                   | NS                                                                | ↓8.1% (O) ↓8.82% (ORRP)                          |                    |                           |
|                                  |                                              |         |                                                                          |                                  | TBARS                                                                 | ↓25% (O) ↓12.5%<br>↓16.7% (OPRP)                                  | ↑23.53% (O) 17.65% (ORRP)                        |                    |                           |
|                                  |                                              |         |                                                                          |                                  | Lipids, CHOL                                                          | NS                                                                | NS                                               |                    |                           |

|                                   |                                                                    |         |              |                                                           |                                                                                                                                                       |                               |                            |               |                        |
|-----------------------------------|--------------------------------------------------------------------|---------|--------------|-----------------------------------------------------------|-------------------------------------------------------------------------------------------------------------------------------------------------------|-------------------------------|----------------------------|---------------|------------------------|
|                                   |                                                                    |         |              | Meat composition in HL meat                               | Water, protein, lipids, ash, CHOL, Fe, Na                                                                                                             | NS                            | NS                         |               |                        |
|                                   |                                                                    |         |              | Bone traits                                               | Bone weight                                                                                                                                           | NS                            | ↑13.46% (O)                |               |                        |
|                                   |                                                                    |         |              |                                                           | Femur weight                                                                                                                                          | NS                            | ↑19.15% (O) ↑14.89% (OPRP) |               |                        |
|                                   |                                                                    |         |              |                                                           | HL weight, Bone % of HL, Meat, Femur fract % of HL, Meat/bones ratio, Femur weight, Femur % of HL, Femur minor diameter, Femur length, Femur fracture | NS                            | NS                         |               |                        |
| <b>Oregano essential oil (OO)</b> | 0.1, 0.2%                                                          | Rabbits | E, 200 mg/kg | Lipid oxidation of muscle LD (refrigerated storage, 4 °C) | MDA                                                                                                                                                   | ↓56.27% (0.1%) ↓49.91% (0.2%) | ↑39.13% (O) ↑48.91% (O)    | 42 days       | Botsoglou et al., 2004 |
| <b>Rosemary extract (RE)</b>      | 0.04 (RE), or + 0.02 gallic acid (REG) or + 60 mg/kg of VitE (REE) | Swine   | E, 60 mg/kg  | Slaughter traits                                          | Slaughter weight, lean meat percentage, post-mortem pH                                                                                                | NS                            | NS                         | 115, 122 days | Haak et al. (2008)     |
|                                   |                                                                    |         |              | Muscle LT and subcutaneous fat composition                | Total fatty acid content                                                                                                                              | ↑58.13% (R)                   | ↑48.33% (R)                |               |                        |
|                                   |                                                                    |         |              |                                                           | SFA, MUFA, n-6, n-3, PUFA                                                                                                                             | NS                            | NS                         |               |                        |
|                                   |                                                                    |         |              | Lipid oxidation of LT muscle                              | TBARS (d 2) raw meat                                                                                                                                  | NS                            | NS                         |               |                        |

|                                |      |       |   |                                                   |                                                                 |                          |                             |                     |
|--------------------------------|------|-------|---|---------------------------------------------------|-----------------------------------------------------------------|--------------------------|-----------------------------|---------------------|
|                                |      |       |   |                                                   | TBARS (d 5) raw meat                                            | ↑57.14% (REG)            | ↑96.15% (R) ↑153.85% (REG)  |                     |
|                                |      |       |   |                                                   | TBARS (d 8) raw meat                                            | ↑67.61% (REG)            | ↑129.27% (R) ↑190.24% (REG) |                     |
|                                |      |       |   |                                                   | TBARS (d 2) cooked meat                                         | NS                       | ↑34.82% (REG)               |                     |
|                                |      |       |   |                                                   | TBARS (d 5) cooked meat                                         | NS                       | ↑14.55% (REG)               |                     |
|                                |      |       |   |                                                   | TBARS (d 8) cooked meat                                         | NS                       | NS                          |                     |
|                                |      |       |   |                                                   | Carbonyl and thiol groups in raw and cooked meat during storage | NS                       | NS                          |                     |
|                                |      |       |   |                                                   | CL, DTS                                                         | NS                       | NS                          |                     |
| Green tea catechins            | 0.02 | Swine | E | Slaughter traits                                  | Kill-out                                                        | C: ↓1.03%; GM105: ↑1.05% | NS                          | Mason et al. (2005) |
| GM (grassmeal * enriched diet) |      |       |   |                                                   | Backfat                                                         | GM105: ↑10.38%           | NS                          |                     |
|                                |      |       |   |                                                   | CL, DTS                                                         | NS                       | NS                          |                     |
|                                |      |       |   | Carcass traits                                    | pH24                                                            | GM50: ↓4.87%             | NS                          |                     |
|                                |      |       |   |                                                   | Fat depth (Shoulder)                                            | GM80: ↑38.02%            | NS                          |                     |
|                                |      |       |   |                                                   | Fat depth (Ham2)                                                | GM80: ↑58.3%             | NS                          |                     |
|                                |      |       |   |                                                   | pH45, Fat depth (LD), Fat depth (Ham1)                          | NS                       | NS                          |                     |
|                                |      |       |   | Meat composition of <i>Longissimus dorsi</i> (LD) | IMF, Protein, Moisture                                          | NS                       | NS                          |                     |
|                                |      |       |   |                                                   | Ash                                                             | GM50: ↑14.78%            | NS                          |                     |

|                                                                                                                           |                                               |                                         |        |
|---------------------------------------------------------------------------------------------------------------------------|-----------------------------------------------|-----------------------------------------|--------|
| Lipid oxidation in LD stored under aerobic or MAP: 40% CO <sub>2</sub> :60% O <sub>2</sub> conditions at 4 °C for 10 days | α-tocopherol                                  | NS                                      | ↓29%   |
|                                                                                                                           | TBARS (aerobic condition)                     | NS                                      | NS     |
|                                                                                                                           |                                               |                                         |        |
|                                                                                                                           |                                               |                                         |        |
|                                                                                                                           | TBARS in MAP ( d 2)                           | GM105: ↓76.92%                          | NS     |
|                                                                                                                           | TBARS in MAP (d 4)                            | GM105: ↓41.18%; GM50: ↓44.4%            | NS     |
|                                                                                                                           |                                               |                                         |        |
|                                                                                                                           | TBARS in MAP (d 0,6,8,10)                     | NS                                      | NS     |
|                                                                                                                           |                                               |                                         |        |
|                                                                                                                           |                                               |                                         |        |
| FAC                                                                                                                       | C20:4n 6                                      | GM105: ↓41.63%; GM50:37.1%              | NS     |
|                                                                                                                           |                                               |                                         |        |
|                                                                                                                           | n-6/n-3                                       | C: ↓56.55%                              | NS     |
|                                                                                                                           | from C14:0 to C20:3n-6;                       | NS                                      | NS     |
|                                                                                                                           | from to C20:5n-3 to C22.6n-3; SFA, MUFA, PUFA |                                         |        |
|                                                                                                                           |                                               |                                         |        |
|                                                                                                                           |                                               |                                         |        |
|                                                                                                                           | L* (d 2) in aerobic conditions                | GM105:↑4.69%                            | ↑4.69% |
|                                                                                                                           | L* (d 0,4,8,10) in aerobic conditions         | NS                                      | NS     |
|                                                                                                                           |                                               |                                         |        |
|                                                                                                                           | L* (d 2) in MAP                               | GM105: ↑7.71%; GM50:↑7.1%; GM80: ↑6.86% | NS     |
|                                                                                                                           |                                               |                                         |        |
|                                                                                                                           |                                               |                                         |        |
|                                                                                                                           |                                               |                                         |        |
|                                                                                                                           |                                               |                                         |        |
|                                                                                                                           |                                               |                                         |        |
|                                                                                                                           |                                               |                                         |        |
|                                                                                                                           | L* (d 4) in MAP                               | GM50: ↑6.15%                            | NS     |
|                                                                                                                           |                                               |                                         |        |
|                                                                                                                           |                                               |                                         |        |

|                                                                                                |        |       |                                     |                  |                                            |                                             |                  |                            |
|------------------------------------------------------------------------------------------------|--------|-------|-------------------------------------|------------------|--------------------------------------------|---------------------------------------------|------------------|----------------------------|
|                                                                                                |        |       |                                     |                  | L* (d 0,8,10) in MAP                       | NS                                          | NS               |                            |
|                                                                                                |        |       |                                     |                  | a* in aerobic conditions (d 0,2,4,8,10)    | NS                                          | NS               |                            |
|                                                                                                |        |       |                                     |                  | a* in MAP (d 0,4,8,10)                     | NS                                          | NS               |                            |
|                                                                                                |        |       |                                     |                  | a* in MAP (2)                              | GM105: ↑31.31%                              | NS               |                            |
|                                                                                                |        |       |                                     |                  | b*in aerobic conditions (d 0,2,4,8,10)     | NS                                          | NS               |                            |
|                                                                                                |        |       |                                     |                  | b*in MAP (2)                               | GM105: ↑23.74%; GM50: ↑16.63%; GM80: ↑23.9% | ↑17.8%           |                            |
|                                                                                                |        |       |                                     |                  | b*in MAP (4)                               | GM105: ↑22.59%                              | NS               |                            |
|                                                                                                |        |       |                                     |                  | b* in MAP (d 0,8,10)                       | NS                                          | NS               |                            |
| <b>Flavonoid extract-enriched diet (AFlav); and phenolic compound-enriched extract (APhen)</b> | 0.2    | Swine | E, 200 mg/kg                        | FAC              | C20:1 n-9                                  | NS                                          | ↓18.48% (Aflav)  | Gonzalez and Tejada (2007) |
|                                                                                                |        |       |                                     |                  |                                            |                                             |                  |                            |
|                                                                                                |        |       |                                     |                  | Other FA                                   | NS                                          | NS               |                            |
|                                                                                                |        |       |                                     | Lipid oxidation  | MDA LD muscle (refrigerated storage, 10 d) | NS                                          | ↑ (Aflav, Aphen) |                            |
| <b>Olive leaves</b>                                                                            | 0.5, 1 | Swine | E in diet enriched with linseed oil | FAC of LD muscle | From C12:0 to C16:1                        | NS                                          | NS               | Botsoglou et al. (2012)    |

|                     |                             |    |
|---------------------|-----------------------------|----|
| C18:0               | ↑15.27% (0.5%) ↑17.24% (1%) | NS |
| <i>cis</i> -9 C18:1 | NS                          | NS |
| C18:2n-6            | ↓26.74% (0.5%) ↓28.83% (1%) | NS |
| C18:3n-3            | ↑413% (0.5%) ↑446.4% (1%)   | NS |
| C20:0, C20:1        | NS                          | NS |
| C20:3n-6            | ↓41.18% (0.5%) ↓23.53% (1%) | NS |
| C20:4n-6            | ↓52.1% (0.5%) ↓41.7% (1%)   | NS |
| C20:5n-3            | ↑460% (0.5%) ↑580% (1%)     | NS |
| C22:5n-3            | ↑216.7% (0.5%) ↑166.7% (1%) | NS |
| C22:6n-3            | NS                          | NS |
| SFA                 | ↑5.86% (0.5%) ↑7.76% (1%)   | NS |
| MUFA                | ↓3.22% (0.5%) ↓2.37% (1%)   | NS |
| PUFA                | NS                          | NS |
| n-6 PUFA            | ↓28.22% (0.5%) ↓29.15% (1%) | NS |

|                    |       |       |   |                   |                                                                                                                           |                                          |                                |         |                   |
|--------------------|-------|-------|---|-------------------|---------------------------------------------------------------------------------------------------------------------------|------------------------------------------|--------------------------------|---------|-------------------|
|                    |       |       |   |                   | n-3 PUFA                                                                                                                  | ↑350.27% (0.5%)<br>↑373.22% (1%)         | NS                             |         |                   |
|                    |       |       |   |                   | n- 6:n- 3                                                                                                                 | ↓84.05% (0.5%)<br>↓85.01% (1%)           | NS                             |         |                   |
|                    |       |       |   |                   | PUFA:SFA                                                                                                                  | ↓7.69% (0.5%)<br>↓8.97% (1%)             | NS                             |         |                   |
|                    |       |       |   |                   | α-Tocopherol                                                                                                              | LD: ↑6.41% (0.5%)                        | ↓70.57% (0.5%)<br>↓69.15% (1%) |         |                   |
|                    |       |       |   | Lipid oxidation   | MDA during 9 days of storage in LD muscle                                                                                 | LD: ↓0.5%>1%; S: ↓0.5%>1% <i>P</i> <0.05 | ↑0.5%>0.1%                     |         |                   |
|                    |       |       |   | Protein oxidation | Carbonyl groups                                                                                                           | NS                                       | NS                             |         |                   |
|                    |       |       |   | Sensory analysis  |                                                                                                                           | Positive effects                         | Positive effects without NS    |         |                   |
| <hr/>              |       |       |   |                   |                                                                                                                           |                                          |                                |         |                   |
| OO, quercetin (QU) | 0.025 | Swine | E | Carcass traits    | Pre-slaughter BW, Carcass straight length, Carcass slanting length, Back-fat thickness, EC (45 min), EC (24 h), Opto-Star | NS                                       | NS                             | 28 days | Zou et al. (2016) |
|                    |       |       |   |                   | Hot CWs (after 5 hours of transportation)                                                                                 | ↑8.25% (OO)                              | ↑7.14% (OO)                    |         |                   |
|                    |       |       |   |                   | Dressing out                                                                                                              | ↑8.16% (OO)                              | ↑6.89% (OO)                    |         |                   |

|                  |              |                           |    |
|------------------|--------------|---------------------------|----|
| AA status muscle | pHi (45 min) | ↑5.56% (OO) ↑4.9% (QU)    | NS |
|                  | pHu (24 h)   | ↑3.18% (Q)                | NS |
|                  | ROS          | ↓20.96% (QU) ↓17.88% (OO) | NS |
|                  | TBARS        | ↓20.39% (QU) ↓19.42% (OO) | NS |
|                  | T-SOD,GPx    | NS                        | NS |

---

Abbreviations: AA, antioxidant activity; BW, body weight; CHOL, cholesterol; CL, carcass lean; CY, carcass yield; CW, carcass weight; DTS, days to slaughter; EC, electrical conductivity; FAC, fatty acid composition; GPx, glutathione peroxidase; HL, hind leg; IMF, intramuscular fat; LD, *Longissimus dorsi* muscle; LT, *Longissimus thoracis* muscle; MAP, modified atmosphere packaging; MC, meat colour; MDA, malondialdehyde; NS, not significant; NTS, not transport stressed group; pHi, pH immediately; pHu, pH ultimately; ROS, reactive oxygen species; TBARS, thiobarbituric acid reactive substances; T-SOD, total superoxide-dismutase.



Table S2 Effects on quantitative and qualitative traits of lamb meat and cattle and sheep milk

| PFA                               | Dose extract                            | Species | Vitamin confronted | Animal product | Type of parameter                                 | Trait evaluated                                                                                             | Comparison to negative control: effect (plant product dose)                              | Comparison to positive control: effect (dose) | Period of study (d, days; wk, weeks) | Reference            |
|-----------------------------------|-----------------------------------------|---------|--------------------|----------------|---------------------------------------------------|-------------------------------------------------------------------------------------------------------------|------------------------------------------------------------------------------------------|-----------------------------------------------|--------------------------------------|----------------------|
| Plant extract rich in polyphenols | 1 along with 375 UI of Vitamin E (PERP) | Bovine  | E, 375 IU/kg       | Milk           | FAC of milk                                       | Total SFA                                                                                                   | 2 control diets: 1 with maize silage (C), 1 with Linseed oil (CL); C: ↓25.99% CL: ↓3.31% | ↓6.52%                                        | 5 weeks                              | Ferlay et al. (2010) |
|                                   |                                         |         |                    |                |                                                   | Total MUFA                                                                                                  | C: ↑78.28% CL: ↑3.94%                                                                    | ↑9.67%                                        |                                      |                      |
| Plant extract rich in polyphenols | 12.6 along with 2800 mg/kg              | Bovine  | E, 2800 mg/kg      | Meat           | Oxidative stability of semitendinosus (ST) steaks |                                                                                                             |                                                                                          |                                               |                                      | Gobert et al. (2010) |
|                                   |                                         |         |                    |                | Ageing in carcass                                 | MDA ST muscle after 14 d (V) in a tray under-vacuum packaging                                               | NS                                                                                       | NS                                            |                                      |                      |
|                                   |                                         |         |                    |                |                                                   | 4 d aerobic packaging (A)                                                                                   | NS                                                                                       | NS                                            |                                      |                      |
|                                   |                                         |         |                    |                |                                                   | 7 d under modified atmosphere packaging (70:30, O <sub>2</sub> /CO <sub>2</sub> ) (ageing in carcass) (MMA) | ↓72.6 3%                                                                                 | NS                                            |                                      |                      |
|                                   |                                         |         |                    |                | Ageing under-vacuum                               | V                                                                                                           | NS                                                                                       | NS                                            |                                      |                      |
|                                   |                                         |         |                    |                |                                                   | A                                                                                                           | NS                                                                                       | NS                                            |                                      |                      |

|                       |             |       |              |      |                                                                           |                           |         |          |    |                            |
|-----------------------|-------------|-------|--------------|------|---------------------------------------------------------------------------|---------------------------|---------|----------|----|----------------------------|
|                       |             |       |              |      |                                                                           | MA                        | ↓80.74% | NS       |    |                            |
|                       |             |       |              |      | Oxidative stability of LT muscle                                          |                           | NS      | NS       |    |                            |
|                       |             |       |              |      | Ageing in carcass                                                         |                           | NS      | NS       |    |                            |
|                       |             |       |              |      |                                                                           |                           | ↓67.07% | NS       |    |                            |
|                       |             |       |              |      | Ageing under-vacuum                                                       | V                         | NS      | NS       |    |                            |
|                       |             |       |              |      |                                                                           | A                         | NS      | NS       |    |                            |
|                       |             |       |              |      |                                                                           | MA                        | ↓84.55% | NS       |    |                            |
|                       |             |       |              |      |                                                                           | TAS                       | NS      | NS       |    |                            |
| Saffron petal extract | 0.0025,0.05 | Ovine | E, 225 IU/kg | Meat | Carcass traits                                                            | Hot CW, Cold CW           | NS      | NS       | 56 | Alipour et al. (2019)      |
| Red wine extract      | 0.09        | Ovine | E            | Meat | Volatile compounds in omega-3 enriched lamb <i>longissimus dorsi</i> (LD) | 2-Heptanone               | NS      | ↑30.61%  |    | Rivas-Canedo et al. (2013) |
|                       |             |       |              |      |                                                                           | 3,5-Octadien-2-one        | NS      | ↑81.16%  |    |                            |
|                       |             |       |              |      |                                                                           | 2-Penten-1-ol             | NS      | ↑90.24%  |    |                            |
|                       |             |       |              |      |                                                                           | 2-Octen-1-ol              | NS      | ↑47.44%  |    |                            |
|                       |             |       |              |      |                                                                           | 1-Penten-3-ol             | NS      | ↑58.5%   |    |                            |
|                       |             |       |              |      |                                                                           | 1-Octen-3-o               | NS      | ↑60.81%  |    |                            |
|                       |             |       |              |      |                                                                           | Pentane                   | NS      | NS       |    |                            |
|                       |             |       |              |      |                                                                           | Heptane                   | NS      | NS       |    |                            |
|                       |             |       |              |      |                                                                           | Benzene                   | NS      | ↑45.1%   |    |                            |
|                       |             |       |              |      |                                                                           | Phenylacetaldehyde        | NS      | ↑37.1%   |    |                            |
|                       |             |       |              |      |                                                                           | Ethylbenzaldehyde         | NS      | ↑63.6%   |    |                            |
|                       |             |       |              |      |                                                                           | Trimethylamine            | NS      | ↑107.82% |    |                            |
|                       |             |       |              |      |                                                                           | Unknown compound LRI 1093 | NS      | ↑115.1%  |    |                            |

|              |       |       |              |      |                                              |                                    |                               |              |                            |
|--------------|-------|-------|--------------|------|----------------------------------------------|------------------------------------|-------------------------------|--------------|----------------------------|
|              |       |       |              |      |                                              | 2-Propanone                        | NS                            | ↓36.25%      |                            |
|              |       |       |              |      |                                              | Dimethylsulfide                    | NS                            | ↓31.74%      |                            |
|              |       |       |              |      |                                              | 2,3-Butanedione                    | ↑86.37%                       | NS           |                            |
|              |       |       |              |      |                                              | 2,3-Butanediol, 1-Hexanol          | NS                            | NS           |                            |
| Grape pomace | 5, 10 | Ovine | E, 500 mg/kg | Milk | Milk yield, composition                      |                                    | NS                            | NS           | Gómez-Cortés et al. (2018) |
|              |       |       |              | Meat | Carcass traits                               | Slaughter age (days)               | NS                            | NS           |                            |
|              |       |       |              |      |                                              | Cold carcass weight, Carcass yield | NS                            | NS           |                            |
|              |       |       |              |      | pH, color, cooking losses, texture and       | Meat pH 24 h post slaughter        |                               |              |                            |
|              |       |       |              |      |                                              |                                    | NS                            | NS           |                            |
|              |       |       |              |      | chemical composition of suckling lamb meat.  | <i>L. thoracis</i>                 |                               |              |                            |
|              |       |       |              |      | Rectus abdominis colour                      | L*, b*, H*                         | NS                            | NS           |                            |
|              |       |       |              |      |                                              | a*                                 | ↑ 32.62% (5%)                 | ↑51.47% (5%) |                            |
|              |       |       |              |      |                                              | C*                                 | ↑12.81% (5%)                  | ↑20% (5%)    |                            |
|              |       |       |              |      | <i>L. thoracis</i> et <i>lumborum</i> colour | L*, a*, C*                         | NS                            | NS           |                            |
|              |       |       |              |      |                                              | b                                  | ↓28.81% (5%)<br>↓23.88% (10%) | NS           |                            |
|              |       |       |              |      |                                              | H*                                 | ↓26.81% (5%)<br>↓25.36% (10%) |              |                            |
|              |       |       |              |      | Subcutaneous fat colour                      | L*                                 | ↓2.29% (10%)                  | ↓2.68% (10%) |                            |
|              |       |       |              |      |                                              | a*,b*, H*, C                       | NS                            | NS           |                            |

|                        |                                                     |                               |               |
|------------------------|-----------------------------------------------------|-------------------------------|---------------|
|                        | Warner-Bratzler shear force                         | NS                            | NS            |
|                        | Cooking losses (%) (WHC)                            | ↓11.2% (5%)<br>↓20.75% (10%)  | ↑13.23% (5%)  |
|                        | Moisture, fat, protein                              | NS                            | NS            |
| FA composition of meat | iso C14:0                                           | ↓26.32% (5%)<br>↓57.89% (10%) | ↓50% (10%)    |
| MUFA                   | SFA                                                 | NS                            | NS            |
|                        | <i>trans</i> -3 C16:1                               | ↑50% (5%)                     | ↑100% (5%)    |
|                        | <i>cis</i> -9 C17:1                                 | NS                            | ↑14.81% (5%)  |
|                        | <i>cis</i> (9+10)+ <i>trans</i> -15 C18:1           | ↓10.83% (5%)<br>↓9.75% (10%)  | NS            |
|                        | <i>cis</i> -11 C18:1                                | ↓11.22% (5%)<br>↓14.15% (10%) | NS            |
| PUFA                   | <i>cis</i> -14 C18:1                                | ↑66.7% (5%)                   | NS            |
|                        | <i>cis</i> -15 C24:1                                | ↓40.82% (5%)<br>↓53.06% (10%) | ↓41.03% (10%) |
|                        | <i>trans</i> -9 <i>cis</i> -11 C18:2                | ↑100% (5%)                    | ↑100% (5%)    |
|                        | <i>cis</i> -9 <i>trans</i> -11 <i>cis</i> -15 C18:3 | ↑20.62% (5%)                  | NS            |
|                        | C20:2 n-6                                           | ↑28.57% (5%)                  | NS            |
|                        | MUFA                                                | ↓7.18% (5%)<br>↓5.85% (10%)   | NS            |
|                        | PUFA                                                | NS                            | NS            |
|                        | <i>trans</i> -C18:1                                 | NS                            | NS            |

|                                                         |      |       |              |      |                                                                                                  |                                               |                          |                          |     |                      |
|---------------------------------------------------------|------|-------|--------------|------|--------------------------------------------------------------------------------------------------|-----------------------------------------------|--------------------------|--------------------------|-----|----------------------|
| Red wine extract                                        | 0.09 | Ovine | E, 300 mg/kg | Meat | $\alpha$ -Tocopherol concentration, total phenol content and pH values of n-3 enriched LD muscle | $\alpha$ -Tocopherol                          | NS                       | ↓58.26%                  |     | Muino et al. (2014)  |
|                                                         |      |       |              |      |                                                                                                  | Polyphenols                                   | NS                       | NS                       |     |                      |
|                                                         |      |       |              |      |                                                                                                  | pH24                                          | NS                       | NS                       |     |                      |
|                                                         |      |       |              |      | FA composition (%) of n-3 enriched LD muscle                                                     | Mean (12 d) C22:5n-3                          | ↑40.98%                  | NS                       |     |                      |
|                                                         |      |       |              |      | Sensory evaluation of n-3 enriched LD muscle                                                     | OdourOdour, texture, flavour, overall linking | NS                       | NS                       |     |                      |
| <i>Andrographis paniculata</i> (AP), Turmeric acid (TU) | 0.5  | Goat  | E            | Meat | Lipid oxidation of IS                                                                            | MDA                                           | ↓23.08% (AP)             | ↑2.36% (AP)              | 100 | Karami et al. (2010) |
|                                                         |      |       |              |      | Colour                                                                                           | L*                                            | ↑10.74% (TU)             | ↑14.35% (TU)             |     |                      |
|                                                         |      |       |              |      |                                                                                                  | a*                                            | ↑46.17% (TU)             | ↑42.86% (TU)             |     |                      |
|                                                         |      |       |              |      |                                                                                                  | b*                                            | ↑76.55% (TU)             | ↑76.32% (TU)             |     |                      |
|                                                         |      |       |              |      |                                                                                                  | C*                                            | ↑60.54% (TU)<br>↑9.01% ( | ↑58.79% (TU)<br>↑7.82% ( |     |                      |
|                                                         |      |       |              |      |                                                                                                  | Hue                                           | ↑13.12% (TU)             | ↑14.77% (TU)             |     |                      |
|                                                         |      |       |              |      |                                                                                                  | Vitamin E                                     | ↑23.33% (TU)             | ↑25.42% (TU)             |     |                      |
|                                                         |      |       |              |      |                                                                                                  | Drip loss, cooking loss, tenderness           | NS                       | NS                       |     |                      |

|                                    |      |       |              |      |                                                                                                                                                         |                                                |         |         |          |                      |
|------------------------------------|------|-------|--------------|------|---------------------------------------------------------------------------------------------------------------------------------------------------------|------------------------------------------------|---------|---------|----------|----------------------|
| Rosemary extract –RE- (diterpenes) | 0.06 | Ovine | E, 600 mg/kg | Meat | Average bacterial counts of lamb patties packed in different atmospheres (air, vacuum and high O <sub>2</sub> /CO <sub>2</sub> ) and stored at 4 °C for | TVC air (1 d)                                  | ↓9.9%   | NS      | 4 months | Ortuno et al. (2017) |
| up to 7 days                       |      |       |              |      |                                                                                                                                                         | TVC air (4 d)                                  | ↓8.52%  | ↓8.78%  |          |                      |
|                                    |      |       |              |      |                                                                                                                                                         | TVC (7d)                                       | NS      | NS      |          |                      |
|                                    |      |       |              |      |                                                                                                                                                         | TVC vacuum (1 d)                               | NS      | NS      |          |                      |
|                                    |      |       |              |      |                                                                                                                                                         | TVC vacuum (4 d)                               | ↓13.09% | ↓8.35%  |          |                      |
|                                    |      |       |              |      |                                                                                                                                                         | TVC vacuum (7 d)                               | NS      | NS      |          |                      |
|                                    |      |       |              |      |                                                                                                                                                         | TVC High O <sub>2</sub> /CO <sub>2</sub> (1 d) | NS      | NS      |          |                      |
|                                    |      |       |              |      |                                                                                                                                                         | TVC High O <sub>2</sub> /CO <sub>2</sub> (4 d) | ↓14.1%  | ↓12.90% |          |                      |
|                                    |      |       |              |      |                                                                                                                                                         | TVC High O <sub>2</sub> /CO <sub>2</sub> (7 d) | ↓6.05%  | ↓7.22%  |          |                      |
|                                    |      |       |              |      |                                                                                                                                                         | <i>Pseudomonas</i> spp                         | NS      | NS      |          |                      |
|                                    |      |       |              |      |                                                                                                                                                         | ENB air (1 d)                                  | ↓22.57% | ↓17.08% |          |                      |
|                                    |      |       |              |      |                                                                                                                                                         | ENB air (4, 7 d)                               | NS      | NS      |          |                      |
|                                    |      |       |              |      |                                                                                                                                                         | ENB vacuum (1 d)                               | ↓21.58% | ↓19.92% |          |                      |
|                                    |      |       |              |      |                                                                                                                                                         | ENB vacuum (4, 7d)                             | NS      | NS      |          |                      |
|                                    |      |       |              |      |                                                                                                                                                         | ENB High O <sub>2</sub> /CO <sub>2</sub> (1 d) | ↓24.03% | ↓19.67% |          |                      |
|                                    |      |       |              |      |                                                                                                                                                         | <i>Brochothrix thermosphacta</i>               | NS      | NS      |          |                      |
|                                    |      |       |              |      |                                                                                                                                                         | LAB air (1 d)                                  | ↓20.19% | ↓12.37% |          |                      |

|                                                                                                                                                   |                                                       |         |         |
|---------------------------------------------------------------------------------------------------------------------------------------------------|-------------------------------------------------------|---------|---------|
|                                                                                                                                                   | LAB air (4 d)                                         | ↓18.92% | ↓16.43% |
|                                                                                                                                                   | LAB air (7 d)                                         | ↓12.25% | ↓12.11% |
|                                                                                                                                                   | LAB vacuum (1 d)                                      | ↓17.99% | ↓14.1%  |
|                                                                                                                                                   | LAB vacuum (4 d)                                      | ↓27.31% | ↓18.1%  |
|                                                                                                                                                   | LAB vacuum (7 d)                                      | ↓11.82% | ↓15.82% |
|                                                                                                                                                   | LAB vacuum High O <sub>2</sub> /CO <sub>2</sub> (1 d) | ↓16.7%  | ↓14.32% |
|                                                                                                                                                   | LAB vacuum High O <sub>2</sub> /CO <sub>2</sub> (4 d) | ↓24.95% | ↓22.95% |
|                                                                                                                                                   | LAB vacuum High O <sub>2</sub> /CO <sub>2</sub> (7 d) | ↓11.03% | ↓13.61% |
| Average values of pH, colour, (TBARS) of lamb patties packed in different atmospheres (air, vacuum and high O <sub>2</sub> /CO <sub>2</sub> ) and |                                                       |         |         |
|                                                                                                                                                   | pH air (7 d)                                          | ↑3.74%  | NS      |
| stored at 4 °C for up to 7 days                                                                                                                   |                                                       |         |         |
|                                                                                                                                                   | pH air (1, 4 d)                                       | NS      | NS      |
|                                                                                                                                                   | pH vacuum (1,4, 7 d)                                  | NS      | NS      |
|                                                                                                                                                   | pH High O <sub>2</sub> /CO <sub>2</sub> (1, 4 d)      | NS      | NS      |
|                                                                                                                                                   | pH High O <sub>2</sub> /CO <sub>2</sub> (7 d)         | ↑3.37%  | NS      |
|                                                                                                                                                   | Lightness                                             | NS      | NS      |
|                                                                                                                                                   | Hue air (1 d)                                         | NS      | NS      |
|                                                                                                                                                   | Hue air (4 d)                                         | NS      | ↑33.47% |

|                                                                                                                                                                    |                                                   |         |         |
|--------------------------------------------------------------------------------------------------------------------------------------------------------------------|---------------------------------------------------|---------|---------|
| Lipid oxidation                                                                                                                                                    | Heu air (7 d)                                     | ↓12.64% | NS      |
|                                                                                                                                                                    | Heu vacuum (1, 4, 7 d)                            | NS      | NS      |
|                                                                                                                                                                    | Heu High O <sub>2</sub> /CO <sub>2</sub> (1, 4 d) | NS      | NS      |
|                                                                                                                                                                    | Heu High O <sub>2</sub> /CO <sub>2</sub> (7 d)    | ↓30.35% | NS      |
|                                                                                                                                                                    | Chroma                                            | NS      | NS      |
|                                                                                                                                                                    | TBARS air (d 1)                                   | NS      | ↑81.25% |
|                                                                                                                                                                    | TBARS air (d 4, 7)                                | NS      | NS      |
|                                                                                                                                                                    | TBARS vacuum (d 1)                                | NS      | ↑87.5%  |
|                                                                                                                                                                    | TBARS vacuum (d 4)                                | NS      | ↑31.58% |
|                                                                                                                                                                    | TBARS vacuum (d 7)                                | NS      | ↑116.7% |
|                                                                                                                                                                    | TBARS High O <sub>2</sub> /CO <sub>2</sub> (d 1)  | NS      | ↑92.41% |
|                                                                                                                                                                    | TBARS High O <sub>2</sub> /CO <sub>2</sub> (d 4)  | NS      | ↑40.37% |
|                                                                                                                                                                    | TBARS High O <sub>2</sub> /CO <sub>2</sub> (d 7)  | ↓24.29% | NS      |
| Average sensory scores of lamb patties packed in different atmospheres (air, vacuum and high O <sub>2</sub> /CO <sub>2</sub> ) and stored at 4 °C for up to 7 days |                                                   |         |         |
|                                                                                                                                                                    | Lean colour air (1 d)                             | NS      | ↓12.2%  |
|                                                                                                                                                                    | Lean colour air (4 d)                             | NS      | NS      |
|                                                                                                                                                                    | Lean colour air (7 d)                             | ↑38.1%  | NS      |
|                                                                                                                                                                    | Lean colour vacuum (1 d)                          | NS      | NS      |



|                                                        |         |         |
|--------------------------------------------------------|---------|---------|
| Lean colour vacuum (4 d)                               | ↑16.95% | NS      |
| Lean colour vacuum (7 d)                               | ↑12.5%  | NS      |
| Lean colour High O <sub>2</sub> /CO <sub>2</sub> (1 d) | NS      | NS      |
| Lean colour High O <sub>2</sub> /CO <sub>2</sub> (4 d) | ↑20.73% | NS      |
| Lean colour High O <sub>2</sub> /CO <sub>2</sub> (7 d) | ↑84.92% | NS      |
| Serum odour air (1 d)                                  | NS      | ↓9.3%   |
| Serum odour air (4 d)                                  | NS      | NS      |
| Serum odour air (7 d)                                  | NS      | NS      |
| Serum odour vacuum (1 d)                               | NS      | NS      |
| Serum odour vacuum (4 d)                               | ↑31.16% | NS      |
| Serum odour vacuum (7 d)                               | ↑22.8%  | ↑18.53% |
| Serum odour High O <sub>2</sub> /CO <sub>2</sub> (1 d) | NS      | NS      |
| Serum odour High O <sub>2</sub> /CO <sub>2</sub> (4 d) | ↑32.81% | NS      |
| Serum odour High O <sub>2</sub> /CO <sub>2</sub> (7 d) | ↑30.25% | NS      |
| Rancid odour air (1 d)                                 | NS      | ↑19.12% |
| Rancid odour air (4 d)                                 | NS      | ↑18.52% |
| Rancid odour air (7 d)                                 | NS      | NS      |
| Rancid odour vacuum (1, 4, 7 d)                        | NS      | NS      |



|      |                                                       |                               |                                 |
|------|-------------------------------------------------------|-------------------------------|---------------------------------|
| MUFA | C8:0                                                  | ↓ 11.60% (10%)                | ↓ 10.56% (5%)<br>↓ 17.01% (10%) |
|      | C10:0                                                 | ↓ 13.1% (10%)                 | ↓ 17.87% (10%)                  |
|      | C12:0                                                 | ↓ 12.95% (10%)                | ↓ 15.58% (10%)                  |
|      | C16:0                                                 | ↑ 5.79% (5%)<br>↑ 6.05% (10%) | NS                              |
|      | C17:0                                                 | ↓ 11.86% (10%)                | NS                              |
|      | C23:0                                                 | ↓ 25% (5%) ↓ 25% (10%)        | ↓ 25% (5%)<br>↓ 25% (10%)       |
|      | C24:0                                                 | ↓ 25% (5%)                    | NS                              |
|      | 17:0 iso                                              | ↓ 12% (10%)                   | ↓ 8.33% (10%)                   |
|      | <i>cis</i> -11 C12:1                                  | ↓ 50% (10%)                   | ↓ 66.7% (10%)                   |
|      | <i>cis</i> -7 C16:1                                   | ↓ 5.88% (5%)                  | ↑ 14.29% (5%)<br>↑ 21.43% (10%) |
|      | <i>cis</i> -12 C16:1                                  | ↓ 33.3% (5%,10%)              | NS                              |
|      | <i>cis</i> -9 C17:1                                   | NS                            | ↑ 23.08% (5%)<br>↑ 23.08% (10%) |
|      | <i>trans</i> -C15:1                                   | ↓ 11.1% (10%)                 | ↓ 11.1% (5%,10%)                |
|      | <i>trans</i> -13 C16:1                                | ↑ 33.3% (10%)                 | ↑ 33.3% (10%)                   |
|      | <i>trans</i> -9, <i>cis</i> -12, <i>cis</i> -15 C18:3 | ↑ 50% (10%)                   | NS                              |
| UFA  | C18:3n-3                                              | NS                            | ↓ 18.64% (10%)                  |
|      | C20:4n-6                                              | ↑ 15.39% (10%)                | ↑ 15.39% (10%)                  |

|                                                                                    |                                                                   |               |                                     |
|------------------------------------------------------------------------------------|-------------------------------------------------------------------|---------------|-------------------------------------|
|                                                                                    | SFA                                                               | NS            | ↓2.47%<br>(5%) ↓4.9%<br>(10%)       |
|                                                                                    | MUFA                                                              | NS            | ↑7.12%<br>(5%)<br>↑11.87%<br>(10%)  |
|                                                                                    | MUFA cis                                                          | NS            | ↑12.38%<br>(10%)<br>↑16.78%<br>(5%) |
|                                                                                    | n-6/n-3                                                           | ↑23.23% (10%) | ↑33.57%<br>(10%)                    |
|                                                                                    | De novo synthesis fatty acids                                     | NS            | ↓8.18%<br>(10%)                     |
|                                                                                    |                                                                   |               |                                     |
| Cis- and <i>trans</i> - C18 MUFA and the conjugated and nonconjugated 18:2 isomers | <i>Cis</i> - and <i>trans</i> - 18:1                              |               |                                     |
|                                                                                    | <i>cis</i> -9 18:1                                                | NS            | ↑12.1%<br>(10%)                     |
|                                                                                    | <i>cis</i> -12 18:1                                               | ↑36.73% (10%) | ↑48.9%<br>(10%)                     |
|                                                                                    | <i>cis</i> -14 18:1                                               | NS            | ↑25% (10%)                          |
|                                                                                    | <i>cis</i> -15 18:1                                               | NS            | ↑23.1%<br>(10%)                     |
|                                                                                    | <i>trans</i> -8 18:1                                              | ↑22.2% (10%)  | ↑22.2%<br>(10%)                     |
|                                                                                    | <i>trans</i> -9 18:1                                              | ↑12.5% (10%)  | ↑12.5%<br>(10%)                     |
|                                                                                    | <i>trans</i> -12 18:1                                             | ↑14.52% (10%) | ↑14.52%<br>(10%)                    |
|                                                                                    | <i>trans</i> -13 + <i>trans</i> -14                               | ↓16.88% (5%)  | NS                                  |
|                                                                                    | <i>trans</i> -16 18:1                                             | ↓18.92% (5%)  | ↑9.1%<br>(10%)                      |
|                                                                                    |                                                                   |               |                                     |
|                                                                                    | Non-conjugated C18:2                                              |               |                                     |
|                                                                                    | <i>cis</i> -9, <i>trans</i> -13 + <i>trans</i> -8, <i>cis</i> -12 | ↓13.04% (5%)  | ↑22.5%<br>(10%)                     |
|                                                                                    | <i>trans</i> -8, <i>cis</i> -13                                   | ↓20% (5%)     | ↑25% (10%)                          |

|                                  |                     |       |              |      |                                                                                                                                                   |                                                                         |                               |                               |                             |
|----------------------------------|---------------------|-------|--------------|------|---------------------------------------------------------------------------------------------------------------------------------------------------|-------------------------------------------------------------------------|-------------------------------|-------------------------------|-----------------------------|
|                                  |                     |       |              |      |                                                                                                                                                   | <i>trans</i> -9, <i>cis</i> -12                                         | ↑33.3% (10%)                  | ↑33.3% (10%)                  |                             |
|                                  |                     |       |              |      |                                                                                                                                                   | <i>trans</i> -11, <i>cis</i> -15                                        | ↑33.75% (5%)<br>↑36.25% (10%) | NS                            |                             |
|                                  |                     |       |              |      |                                                                                                                                                   | <i>cis</i> -9, <i>cis</i> -12                                           | ↑10.27% (10%)                 | ↑11.48% (10%)                 |                             |
|                                  |                     |       |              |      |                                                                                                                                                   | <i>cis</i> -9, <i>cis</i> -15                                           | ↑33.3% (10%)                  | ↑33.3% (10%)                  |                             |
|                                  |                     |       |              |      | Conjugated C18:2                                                                                                                                  | <i>trans</i> -13, <i>trans</i> -15 + <i>trans</i> -12, <i>trans</i> -14 | ↑20% (10%)                    | ↑50% (10%)                    |                             |
|                                  |                     |       |              |      |                                                                                                                                                   | Other <i>trans-trans</i>                                                | ↓25% (5%)                     | NS                            |                             |
| Grape pomace, grape seed extract | 0.005 (GSE), 5 (GP) | Ovine | E, 500 mg/kg | Meat | Microbial counts (log cfu g <sup>-1</sup> ) (mean values) on <i>m. longissimus thoracis et lumborum</i> lambs during refrigerated storage at 2 °C | TVC (0, 4, 7 d)                                                         | NS                            | NS                            | Guerra- Rivas et al. (2016) |
|                                  |                     |       |              |      |                                                                                                                                                   | TVC (11 d)                                                              | NS                            | ↑49.28% (GSE)<br>↑46.89% (GP) |                             |
|                                  |                     |       |              |      |                                                                                                                                                   | TVC (14 d)                                                              | ↑32.1% (GSE)<br>↑29.77% (GP)  | ↑81.26% (GSE)<br>↑78.1% (GP)  |                             |
|                                  |                     |       |              |      |                                                                                                                                                   | ENB (0.4,7 d)                                                           | NS                            | NS                            |                             |
|                                  |                     |       |              |      |                                                                                                                                                   | ENB (11 d)                                                              | NS                            | ↑89.2% (GSE)                  |                             |
|                                  |                     |       |              |      |                                                                                                                                                   | ENB (14 d)                                                              | NS                            | ↑187.26% (GSE)                |                             |
|                                  |                     |       |              |      |                                                                                                                                                   | LAB (0, 4, 7, 11 d)                                                     | NS                            | NS                            |                             |

|  |                                                  |                               |                                       |
|--|--------------------------------------------------|-------------------------------|---------------------------------------|
|  | LAB (14 d)                                       | NS                            | ↑319.38%<br>(GSE)<br>↑230.63%<br>(GP) |
|  | <i>Pseudomonas</i> spp (0,4,7 d)                 | NS                            | NS                                    |
|  | <i>Pseudomonas</i> spp (11 d)                    | NS                            | ↑116.85%<br>(GSE)<br>↑113.86%<br>(GP) |
|  | <i>Pseudomonas</i> spp (14 d)                    | ↑33.67% (GSE)<br>↑34.52% (GP) | ↑105.19%<br>(GSE)<br>↑106.5%<br>(GP)  |
|  | <i>Brochothrix thermosphacta</i><br>(0,4,7,14 d) | NS                            | NS                                    |
|  | <i>Brochothrix thermosphacta</i> (11 d)          | ↑106% (GSE)                   | NS                                    |
|  | Lipid oxidation                                  | MDA                           | NS                                    |
|  | Meat colour                                      | lightness (L*) from 11 d      | ↑5.81%<br>(GSE)<br>↑4.54%<br>(GP)     |
|  |                                                  | Redness (a* value) (11, 14 d) | ↓18.64%<br>(GSE)<br>↓23.87%<br>(GP)   |
|  |                                                  | Yellowness (b*)               | NS                                    |
|  |                                                  | Chroma                        | NS                                    |
|  |                                                  | H*                            | ↓(GSE)<br>↓(GP)<br>$P<0.05$           |
|  |                                                  | Appearance scores (7 d)       | ↓ (GSE)<br>$P<0.05$                   |
|  |                                                  | From d 11 onwards             | ↑(GSE)<br>↑(GP)                       |
|  |                                                  | Off-odour from 11 d onwards   | ↑GSE>GP<br>( $P<0.05$ )               |

|                                                  |         |       |              |                 |                                                            |                        |         |          |                      |
|--------------------------------------------------|---------|-------|--------------|-----------------|------------------------------------------------------------|------------------------|---------|----------|----------------------|
| Rosemary diterpenes (carnosic acid and carnosol) | 0.00005 | Ovine | E, 600 mg/kg | Meat            | Microbial counts of lamb loin kept in retailing conditions | TVC (d 0)              | ↓15.31% | ↓12.47%  | Ortuno et al. (2015) |
|                                                  |         |       |              |                 | for up to 18 days                                          |                        |         |          |                      |
|                                                  |         |       |              |                 |                                                            | TVC (d 7)              | ↓14.03% | ↓17.34%  |                      |
|                                                  |         |       |              |                 |                                                            | TVC (11, 14 d)         | NS      | NS       |                      |
|                                                  |         |       |              |                 |                                                            | TVC (d 18)             | ↓11.55% | ↓12.55%  |                      |
|                                                  |         |       |              |                 |                                                            | LAB (d 0)              | NS      | NS       |                      |
|                                                  |         |       |              |                 |                                                            | LAB (d 7)              | ↓28.32% | ↓35.94%  |                      |
|                                                  |         |       |              |                 |                                                            | LAB (d 11)             | ↓32.95% | ↓34.27%  |                      |
|                                                  |         |       |              |                 |                                                            | LAB (d 14)             | ↓35.56% | ↓33.17%  |                      |
|                                                  |         |       |              |                 |                                                            | LAB (d 18)             | ↓34.19% | ↓33%     |                      |
|                                                  |         |       |              |                 |                                                            | ENB (0,7, 11,14, 18 d) | NS      | NS       |                      |
|                                                  |         |       |              | Colour          |                                                            | L* (0, 7,11 d)         | NS      | NS       |                      |
|                                                  |         |       |              |                 |                                                            | L* (14 d)              | ↓5.54%  | ↑4.98%   |                      |
|                                                  |         |       |              |                 |                                                            | L* (18 d)              | NS      | ↑10.96%  |                      |
|                                                  |         |       |              |                 |                                                            | C* (0,7 d)             | NS      | NS       |                      |
|                                                  |         |       |              |                 |                                                            | C (11 d)               | ↑31.3%  | NS       |                      |
|                                                  |         |       |              |                 |                                                            | C (14 d)               | ↑28.57% | ↓16.7%   |                      |
|                                                  |         |       |              |                 |                                                            | C (18 d)               | NS      | ↓30.41%  |                      |
|                                                  |         |       |              |                 |                                                            | H* (d 0)               | NS      | NS       |                      |
|                                                  |         |       |              |                 |                                                            | H* (d 7)               | NS      | ↑25.13%  |                      |
|                                                  |         |       |              |                 |                                                            | H* (d 11)              | ↓40.05% | NS       |                      |
|                                                  |         |       |              |                 |                                                            | H* (d 14)              | ↓42.86% | NS       |                      |
|                                                  |         |       |              |                 |                                                            | H* (d 18)              | NS      | ↑165.48% |                      |
|                                                  |         |       |              | pH              |                                                            |                        | NS      | NS       |                      |
|                                                  |         |       |              | a*              |                                                            |                        | NS      | NS       |                      |
|                                                  |         |       |              | Lipid oxidation |                                                            | TBARS (d 0)            | NS      | NS       |                      |
|                                                  |         |       |              |                 |                                                            | TBARS (d 7)            | ↓32.68% | ↑597.3%  |                      |
|                                                  |         |       |              |                 |                                                            | TBARS (d 11)           | ↓32.96% | ↑644.64% |                      |

|                                                                                        |                               |          |          |
|----------------------------------------------------------------------------------------|-------------------------------|----------|----------|
| Appearance and odour of lamb loin<br>kept in retailing conditions for up to<br>18 days | TBARS (d 14)                  | ↓32.62%  | ↑607.04% |
|                                                                                        | TBARS (d 18)                  | ↓32.39%  | ↑434.95% |
|                                                                                        | Pox (protein oxidation) (d 0) | ↓18.99%  | NS       |
|                                                                                        | Pox (d 7)                     | ↓19.51%  | ↑41.34%  |
|                                                                                        | Pox (d 11)                    | ↓25.94%  | ↑45.39%  |
|                                                                                        | Pox (d 14)                    | ↓34.02%  | NS       |
|                                                                                        | Pox (d 18)                    | ↓31.61%  | ↑50.63%  |
|                                                                                        | Lean colour (0,7 d)           | NS       | NS       |
|                                                                                        | Lean colour (11 d)            | ↑62.99%  | NS       |
|                                                                                        | Lean colour (14 d)            | ↑112.74% | ↓24.94%  |
|                                                                                        | Lean colour (18 d)            | NS       | ↓42.5%   |
|                                                                                        | Fat colour (0,7 d)            | NS       | NS       |
|                                                                                        | Fat colour (11 d)             | ↑23.74%  | NS       |
|                                                                                        | Fat colour (14 d)             | ↑39.27%  | NS       |
|                                                                                        | Fat colour (18 d)             | NS       | ↓20.6%   |
|                                                                                        | Meaty odour (0 d)             | NS       | NS       |
|                                                                                        | Meaty odour (7 d)             | ↑16.06%  | NS       |
|                                                                                        | Meaty odour (11 d)            | ↑71.86%  | NS       |
|                                                                                        | Meaty odour (14 d)            | ↑91.82%  | ↓32.67%  |
|                                                                                        | Meaty odour (18 d)            | NS       | ↓51.06%  |
|                                                                                        | Rancid odour (0 d)            | NS       | NS       |



|                                        |             |        |           |      |                     |                                                                     |          |          |                      |
|----------------------------------------|-------------|--------|-----------|------|---------------------|---------------------------------------------------------------------|----------|----------|----------------------|
|                                        |             |        |           |      |                     | Rancid odour (7 d)                                                  | ↓33.33%  | NS       |                      |
|                                        |             |        |           |      |                     | Rancid odour (11 d)                                                 | ↓45.73%  | NS       |                      |
|                                        |             |        |           |      |                     | Rancid odour (14 d)                                                 | ↓40.26%  | ↑93.28%  |                      |
|                                        |             |        |           |      |                     | Rancid odour (11 d)                                                 | ↓16.05%  | ↑100.56% |                      |
|                                        |             |        |           |      |                     | Acid odour (0, 7, 11 d)                                             | NS       | NS       |                      |
|                                        |             |        |           |      |                     | Acid odour (14 d)                                                   | ↓16.55%  | NS       |                      |
|                                        |             |        |           |      |                     | Acid odour (18 d)                                                   | NS       | ↓15.24%  |                      |
|                                        |             |        |           |      |                     | Freshness (0 d)                                                     | NS       | NS       |                      |
|                                        |             |        |           |      |                     | Freshness (7 d)                                                     | ↑10.62%  | NS       |                      |
|                                        |             |        |           |      |                     | Freshness (11 d)                                                    | ↑73.33%  | NS       |                      |
|                                        |             |        |           |      |                     | Freshness (14 d)                                                    | ↑103.01% | ↓29.50%  |                      |
|                                        |             |        |           |      |                     | Freshness (18 d)                                                    | NS       | ↓45.58%  |                      |
| Yerba Mate<br>(Ilex<br>paraguariensis) | 3, 3 + VitE | Bovine | E, 375 IU | Milk | Milk reducing power |                                                                     | ↑        | NS       | Santos et al. (2019) |
|                                        |             |        |           |      |                     | Polyphenols,conjugated dienes,<br>TBARS<br>Milk yield               | NS       | NS       |                      |
|                                        |             |        |           |      |                     | Milk composition (fat, protein,<br>lactose, and total solids), urea | NS       | NS       |                      |
|                                        |             |        |           |      |                     | Milk concentration of protein and<br>total solids                   | ↓        | NS       |                      |

|                                                  |     |      |   |                                                                                                                                        |                                                                     |                              |              |     |                      |
|--------------------------------------------------|-----|------|---|----------------------------------------------------------------------------------------------------------------------------------------|---------------------------------------------------------------------|------------------------------|--------------|-----|----------------------|
| Andrographis paniculata (AP), Turmeric acid (TU) | 0.5 | Goat | E | Carcass traits                                                                                                                         | Hot carcass (kg), cold carcass (%), cold carcass (kg), dressing out | NS                           | NS           | 100 | Karami et al. (2010) |
|                                                  |     |      |   |                                                                                                                                        | Total meat (kg)                                                     | ↑14.19% (TU)<br>↑13.53% (AP) | NS           |     |                      |
|                                                  |     |      |   |                                                                                                                                        | Total meat (%)                                                      | ↑6.94% (AP)                  | NS           |     |                      |
|                                                  |     |      |   |                                                                                                                                        | Breast and flank                                                    | NS                           | ↑15.99% (TU) |     |                      |
|                                                  |     |      |   | Least square means of proportions (%) of meat, bone, subcutaneous fat and intramuscular fat in different areas of the carcass of goats | Breast and flank                                                    | ↑6.53% (TU)<br>↑5.87% (AP)   | NS           |     |                      |
|                                                  |     |      |   |                                                                                                                                        | Neck                                                                | ↑17.06% (AP)                 | ↑26.67% (AP) |     |                      |
|                                                  |     |      |   |                                                                                                                                        | Leg                                                                 | ↓9.78% (TU)                  | ↓9.78% (TU)  |     |                      |
|                                                  |     |      |   |                                                                                                                                        | Loin                                                                | NS                           | ↑18.55% (AP) |     |                      |
|                                                  |     |      |   |                                                                                                                                        | Breast and flank                                                    | ↓8.72% (TU)<br>↓5.23% (AP)   | ↓7.1% (TU)   |     |                      |
|                                                  |     |      |   |                                                                                                                                        | Eye muscle area                                                     | ↑18.63% (TU)<br>↑17.65% (AP) | NS           |     |                      |
|                                                  |     |      |   |                                                                                                                                        | Eye muscle depth                                                    | ↑21.54% (TU)<br>↑15.39% (AP) | NS           |     |                      |

Eye muscle back fat

↓23.14% (AP)

↓16.22%  
(AP)

---

Abbreviations: CW, carcass weight; ENB, Enterobacteriaceae; FAC, fatty acid composition; IS, *Infraspinatus* muscle; LAB, lactic acid bacteria; LD, *Longissimus dorsi* muscle; LT, *Longissimus thoracis* muscle; MDA, malondialdehyde; MUFA, monounsaturated fatty acids; NS, not significant; PUFA, polyunsaturated fatty acids; SFA, saturated fatty acids; TBARS, thiobarbituric acid reactive substances; TVC, total viable count; UFA, unsaturated fatty acids.
